# Supplementary material for: Topical Endoxifen for Mammographic Density Reduction—A Randomized Controlled Trial
Source: PubMed Central journal article supplement — Oncologist. 2022 May 23;27(7):e597–600. doi: 10.1093/oncolo/oyac102 (PMC9256025; doi:10.1093/oncolo/oyac102), 2022-05-23
Supplement: oyac102_suppl_supplementary_figures.pdf [file oyac102_suppl_supplementary_figures.pdf]

Supplemental Figures for:  
Topical endoxifen for mammographic density reduction – a randomized controlled trial  
Magnus Bäcklund et al.

**Supplemental Figure 1. CONSORT Diagram**

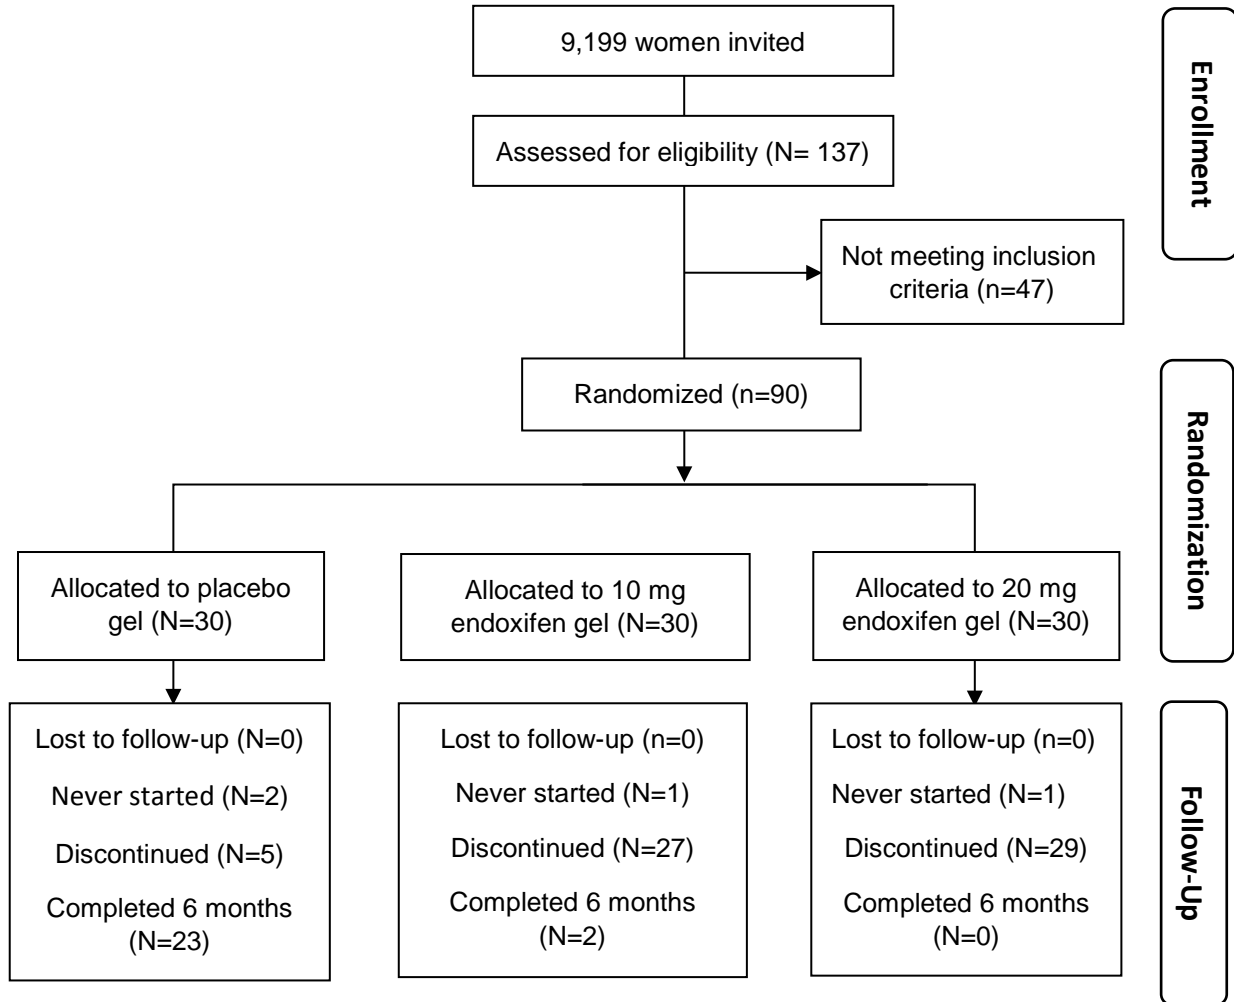

Supplemental Figure 2. Plasma Z-endoxifen level increase ng/ml per month in the 10 mg and 20 mg arms

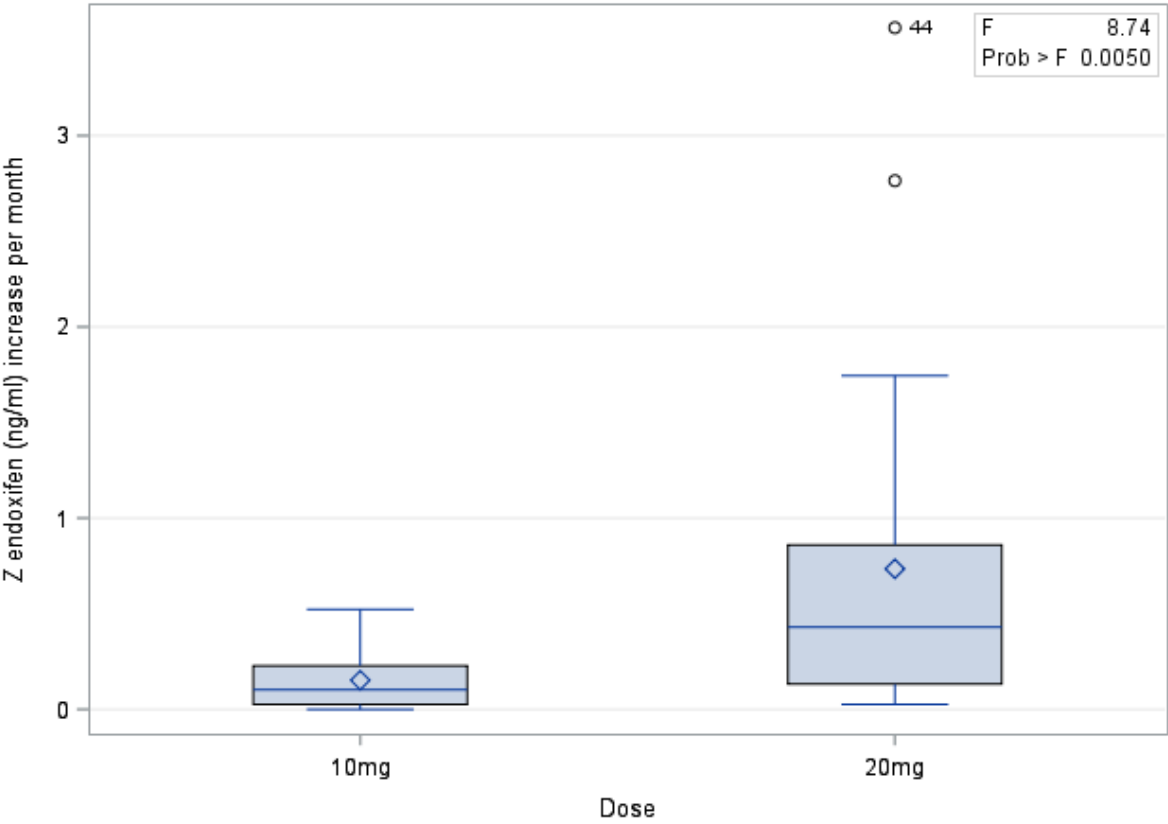

**Supplemental Figure 3. Mammographic density change by months of endoxifen exposure in relation to dose of topical endoxifen**

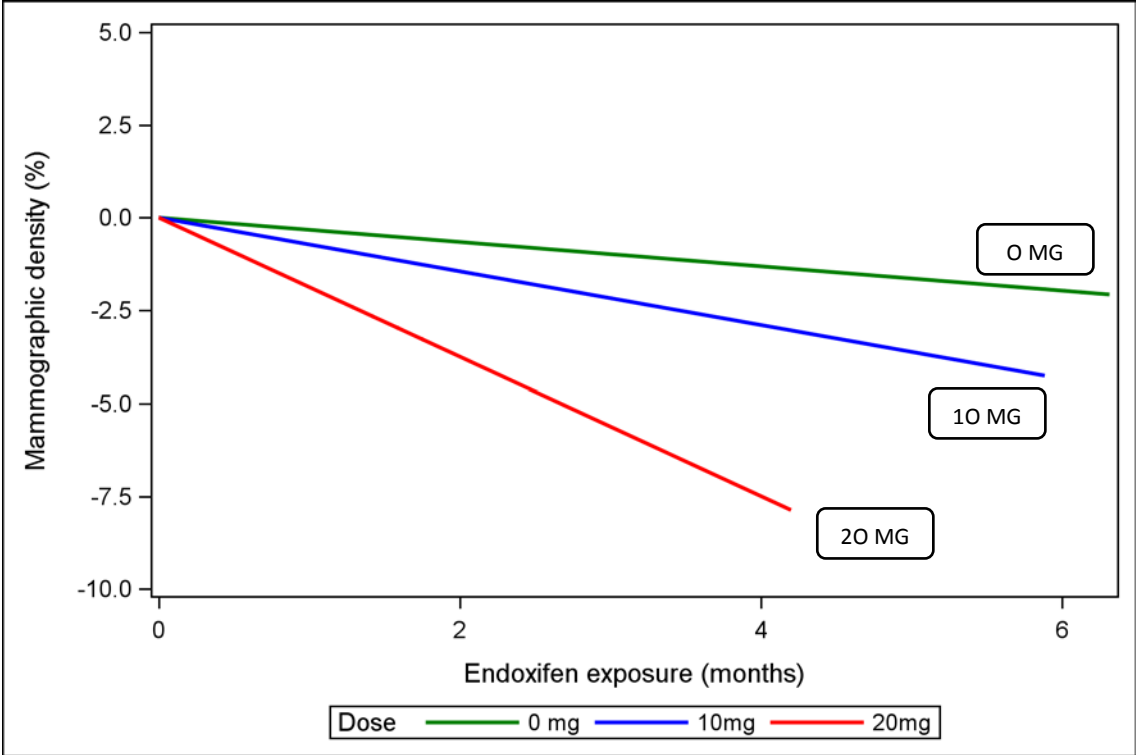

Mixed effects linear regression model was used with maximum likelihood handling of missing follow-up mammographic density measurements. Mammographic density change in the 0 mg arm was beta -0.3 (p=0.12), in the 10 mg arm beta=-0.9% (p=0.04), and in the 20mg arm beta=-1.9% (p=0.03) per month.

**Supplemental Figure 4. Risk ratio of severe symptoms<sup>1</sup> in relation to dose of topical endoxifen**

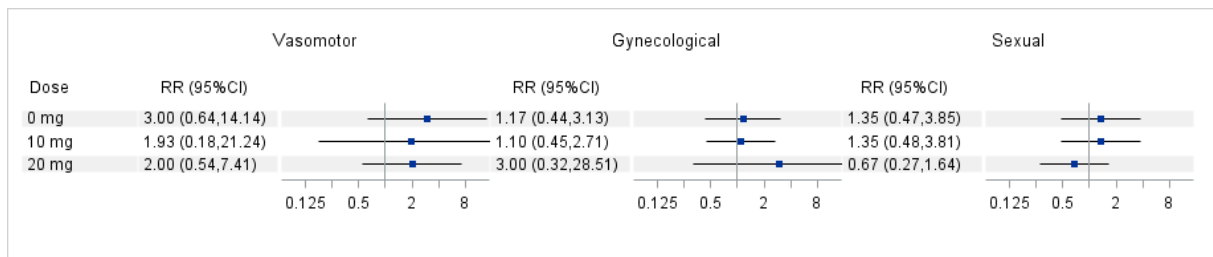

<sup>1</sup>Risk ratio >1 means more severe symptoms during follow-up compared with baseline.

Vasomotor symptoms were hot flashes, cold sweats, night sweats. Gynecological symptoms were vaginal discharge, itching, bleeding, dryness. Sexual symptoms were intercourse discomfort or lost interest in sex.
