# Supplementary material for: Topical Endoxifen for Mammographic Density Reduction—A Randomized Controlled Trial
Source: PubMed Central journal article supplement — Oncologist. 2022 May 23;27(7):e597–600. doi: 10.1093/oncolo/oyac102 (PMC9256025; doi:10.1093/oncolo/oyac102), 2022-05-23
Supplement: oyac102_suppl_supplementary_table.pdf [file oyac102_suppl_supplementary_table.pdf]

Supplemental Table for:  
Topical endoxifen for mammographic density reduction – a randomized controlled trial  
Magnus Bäcklund et al.

## Supplemental Table 1

### Inclusion criteria

To participate, the women must meet the following inclusion criteria:

- Participant in the Karma Cohort
- Attending the national mammography screening program, i.e., aged 40-74 and have performed a screening mammogram maximum 3 months prior to study inclusion
- Mammographic density  $\geq 4.5$  % density (volumetric) measured by Volpara, at the screening mammogram performed in connection to baseline (maximum 3 months prior to inclusion). The threshold value of 4.5% corresponds to the clinically used BI-RADS score A
- Postmenopausal, defined as no period of menstruation during last 12 months independent of any hormonal treatment
- Informed consent must be signed before any study specific assessments are performed

### Exclusion criteria

To participate, the women must not meet any of the exclusion criteria listed below at entry of the study nor under time of treatment.

#### Criteria related to study design

- Any previous or current diagnosis of breast cancer (including carcinoma in situ)
- Any previous diagnosis of cancer with the exception of non-melanoma skin cancer and in situ cancer of the cervix
- A history of major surgery of the breast, e.g., reduction or enlargement, which might affect density measurements
- Mammographic BI-RADS *malignancy* code 3, or above, at baseline mammography, or at mammography during time of treatment. Recall for additional examinations due to technical problems with the mammogram is accepted.
- Currently using oestrogen and progesterone based hormone replacement therapy (oral or patches). Local treatment accepted (ex. Vagifem)
- Non-medical approved drugs against hot-flashes including phytoestrogen

#### Criteria related to safety

- A history of thromboembolic disease such as embolies, deep vein thrombosis, stroke, TIA or myocardial infarction.
- Known APC (Activated Protein C)-resistance, an inherited hemostatic disorder
- Women who have an increased risk of venous thrombosis due to immobilization, e.g., using wheelchair
- Known uncontrolled diabetes
- Hypertension at baseline, defined as systolic pressure higher than 140 mm Hg and diastolic higher than 90 mm Hg
- Prescribed and regular use of anticoagulants (defined as substances included in group B01A in the ATC-system)
- Non-medical approved drugs against hot-flashes including phytoestrogen
- Not able to understand study information and/or informed consent
